# Supplementary material
Source: Copernicus journal article supplement (doi:10.5194/acp-26-7631-2026)
Supplement: Supplementary file 1 [file acp-26-7631-2026-supplement.pdf]

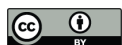

*Supplement of*

**Machine learning interatomic potentials with accurate long-range interactions for molecular dynamics collision simulations of atmospherically-relevant molecules**

**Ivo Neefjes et al.**

*Correspondence to:* Ivo Neefjes (ivo.neefjes@chem.au.dk)

The copyright of individual parts of the supplement might differ from the article licence.

## Contents

|                                                                                                                   |            |
|-------------------------------------------------------------------------------------------------------------------|------------|
| <b>S1 Description of the OPLS-AA force field</b>                                                                  | <b>S2</b>  |
| <b>S2 Hyperparameter tuning plots</b>                                                                             | <b>S3</b>  |
| <b>S3 List of hyperparameters</b>                                                                                 | <b>S4</b>  |
| <b>S4 Removed umbrella sampling simulations</b>                                                                   | <b>S8</b>  |
| <b>S5 Repulsive region of the H<sub>2</sub>SO<sub>4</sub>-H<sub>2</sub>SO<sub>4</sub> potential of mean force</b> | <b>S9</b>  |
| <b>S6 Collision probability heat maps</b>                                                                         | <b>S10</b> |

---

## S1 Description of the OPLS-AA force field

The OPLS intramolecular potential consists of harmonic bond and angle terms, as well as a Fourier series for dihedral angles:

$$U_{\text{intra}}^{\text{OPLS}} = \sum_{i=1}^{N_{\text{bonds}}} \frac{k_i^{\text{b}}}{2} (r_i - r_i^0)^2 + \sum_{j=1}^{N_{\text{angles}}} \frac{k_j^{\theta}}{2} (\theta_j - \theta_j^0)^2 + \sum_{k=1}^{N_{\text{dihedrals}}} \sum_{n=1}^4 \frac{V_n}{2} [1 + \cos(n\phi^k - \phi_n^k)], \quad (\text{S1})$$

where  $k_i^{\text{b}}$ ,  $r_i$ , and  $r_i^0$  are the force constant, instantaneous length, and equilibrium length of bond  $i$ ;  $k_j^{\theta}$ ,  $\theta_j$ , and  $\theta_j^0$  denote the force constant, instantaneous angle, and equilibrium angle for angle  $j$ ; and  $V_n$ ,  $\phi_n^k$ , and  $\phi^k$  represent the Fourier coefficients, phase angles, and instantaneous value of dihedral  $k$ .

Intermolecular interactions, along with intramolecular interactions between atoms separated by more than three covalent bonds, are described by Lennard-Jones and Coulomb terms:

$$U_{\text{inter}} = \sum_{i=1}^{N_1} \sum_{j=1}^{N_2} 4\epsilon_{ij} \left[ \left( \frac{\sigma_{ij}}{r_{ij}} \right)^{12} - \left( \frac{\sigma_{ij}}{r_{ij}} \right)^6 \right] + \sum_{i=1}^{N_1} \sum_{j=1}^{N_2} \frac{1}{4\pi\epsilon_0} \frac{q_i q_j}{r_{ij}}, \quad (\text{S2})$$

where  $r_{ij}$  is the distance between atoms  $i$  and  $j$ ,  $\epsilon_{ij}$  and  $\sigma_{ij}$  are the Lennard-Jones energy and distance parameters,  $q$  is the partial charge, and  $\epsilon_0$  the vacuum permittivity.

We utilized the OPLS parameters from Loukonen et al. (2010). Notably, while the standard OPLS force field scales 1–4 interactions (atoms separated by three bonds) by 0.5, Loukonen et al. (2010) set this scaling factor to zero during parameterization. For consistency, we also neglected these interactions in our simulations.

## S2 Hyperparameter tuning plots

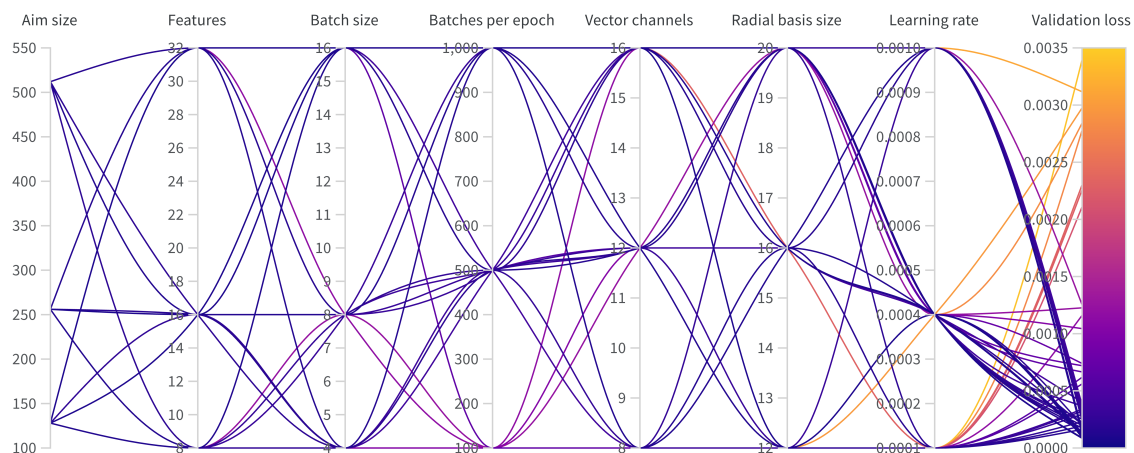

**Figure S1:** Parallel coordinates plot visualizing the hyperparameter optimization for the AIMNet2 model. The model was trained on 2,000 GFN1-xTB structures from the sulfuric acid–sulfuric acid collision system. Each vertical axis represents a specific hyperparameter, while the final axis displays the resulting validation loss. Each connecting line corresponds to a single training experiment, illustrating how different parameter combinations correlate with model performance.

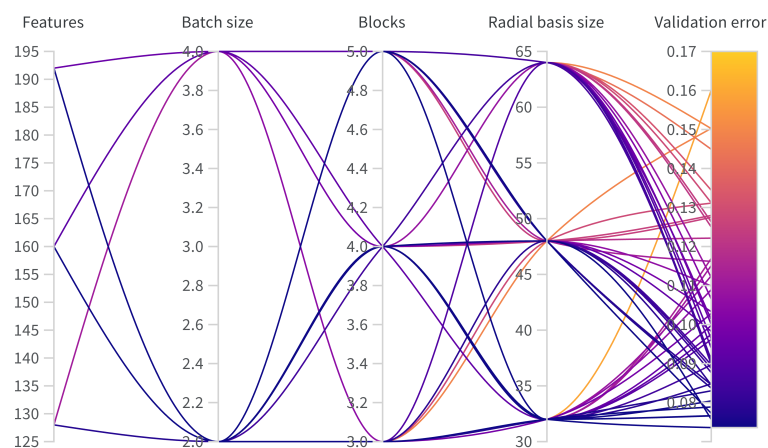

**Figure S2:** Parallel coordinates plot visualizing the hyperparameter optimization for the PaiNN model. The model was trained on 2,000 GFN1-xTB structures from the sulfuric acid–sulfuric acid collision system. Each vertical axis represents a specific hyperparameter, while the final axis displays the resulting validation loss. Each connecting line corresponds to a single training experiment, illustrating how different parameter combinations correlate with model performance.

### S3 List of hyperparameters

This section details the hyperparameters used for training the AIMNet2 and PaiNN models. We also provide example model definition and training configuration files for the AIMNet2 model, specifically for the sulfuric acid–sulfuric acid system trained on GFN1-xTB data. PaiNN calculations were conducted using the JK framework (Kubečka et al., 2024). All hyperparameters not explicitly listed here were maintained at their default values.

| AIMNet2                       |                    | PaiNN               |                    |
|-------------------------------|--------------------|---------------------|--------------------|
| Parameter                     | Value              | Parameter           | Value              |
| AIM size                      | 128                | Features            | 256                |
| Vector channels (ncomb_v)     | 16                 | Cutoff radius       | 10.0 Å             |
| Features                      | 16                 | Radial basis        | 32                 |
| Cutoff radius (rc_s)          | 5.0 Å              | Batch size          | 2                  |
| Radial basis size (nshifts_s) | 20                 | Energy weight       | 0.01               |
| Coulombic cutoff              | 4.6 Å              | Forces weight       | 1.0                |
| DFTD3 s6                      | 1.0                | Validation fraction | 10%                |
| DFTD3 s8                      | 2.4                | Learning rate       | $1 \times 10^{-4}$ |
| DFTD3 a1                      | 0.63               | Epochs              | 1,000              |
| DFTD3 a2                      | 5.0                | Blocks              | 4                  |
| Batch size                    | 16                 |                     |                    |
| Batches per epoch             | 4,000              |                     |                    |
| Validation fraction           | 10%                |                     |                    |
| Charges weight                | 0.01               |                     |                    |
| Energy weight                 | 0.1                |                     |                    |
| Forces weight                 | 1.0                |                     |                    |
| Learning rate                 | $4 \times 10^{-4}$ |                     |                    |
| Weight decay                  | $1 \times 10^{-8}$ |                     |                    |
| Epochs                        | 1,000              |                     |                    |

**File S1:** example of AIMNet2 model definition file

```
class: aimnet.models.AIMNet2
kwargs:
  nfeature: 16
  d2features: true
  ncomb_v: 16
  hidden:
    - - 512
      - 380
    - - 512
      - 380
    - - 512
      - 380
      - 380
  aim_size: 128
  aev:
    rc_s: 5.0
    nshifts_s: 20
  outputs:
    energy_mlp:
      class: aimnet.modules.Output
      kwargs:
        n_in: 128
        n_out: 1
        key_in: aim
        key_out: energy
      mlp:
        activation_fn: torch.nn.GELU
        last_linear: true
        hidden:
          - 128
          - 128
    atomic_shift:
      class: aimnet.modules.AtomicShift
      kwargs:
        key_in: energy
        key_out: energy
    atomic_sum:
      class: aimnet.modules.AtomicSum
      kwargs:
        key_in: energy
        key_out: energy
    lrcoulomb:
      class: aimnet.modules.LRCoulomb
      kwargs:
        rc: 4.6
        key_in: charges
        key_out: energy
    dftd3:
      class: aimnet.modules.DFTD3
      kwargs:
        s6: 1.0
        s8: 2.4
        a1: 0.63
        a2: 5.0
        key_out: energy
```

**File S2:** example of AIMNet2 training configuration file

```
checkpoint:
  dirname: checkpoints
  filename_prefix: lsa_lsa_XTB1
  kwargs:
    n_saved: 1
    require_empty: false
data:
  datasets:
    train:
      class: aimnet.data.SizeGroupedDataset
      kwargs: {}
    val:
      class: aimnet.data.SizeGroupedDataset
      kwargs: {}
  ddp_load_full_dataset: false
  loaders:
    train:
      num_workers: 0
      pin_memory: true
    val:
      num_workers: 0
      pin_memory: true
  sae:
    energy:
      file: lsa_lsa_20K_XTB_training_sae.yaml
      mode: linreg
  samplers:
    train:
      class: aimnet.data.SizeGroupedSampler
      kwargs:
        batch_mode: molecules
        batch_size: 16
        batches_per_epoch: 4000
        shuffle: true
    val:
      class: aimnet.data.SizeGroupedSampler
      kwargs:
        batch_mode: molecules
        batch_size: 16
        batches_per_epoch: -1
        shuffle: false
  separate_val: true
  train: lsa_lsa_20K_XTB_training.h5
  val:
  val_fraction: 0.1
  x:
  - coord
  - numbers
  - charge
  y:
  - energy
  - forces
  - charges
loss:
  class: aimnet.train.loss.MTLoss
  kwargs:
    components:
      charges:
        fn: aimnet.train.loss.peratom_loss_fn
        kwargs:
          key_pred: charges
          key_true: charges
        weight: 0.01
      energy:
        fn: aimnet.train.loss.energy_loss_fn
        weight: 0.1
      forces:
        fn: aimnet.train.loss.peratom_loss_fn
        kwargs:
          key_pred: forces
          key_true: forces
        weight: 1.0
```

```

metrics:
  class: aimnet.train.metrics.RegMultiMetric
  kwargs:
    cfg:
      charges:
        abbr: q
        peratom: true
      dipole:
        abbr: D
        mult: 3
        scale: 1.0
      energy:
        abbr: E
        scale: 23.06
      forces:
        abbr: F
        mult: 3
        peratom: true
        scale: 23.06
      quadrupole:
        abbr: Q
        mult: 6
        scale: 1.0
      volumes:
        abbr: V
        peratom: true
optimizer:
  class: torch.optim.RAdam
  force_no_train: []
  force_train: []
  kwargs:
    lr: 0.0004
    weight_decay: 1.0e-08
  param_groups:
    shifts:
      re: .*atomic_shift.shifts.weight$
      weight_decay: 0.0
run_name: grid_search
scheduler:
  class: ignite.handlers.param_scheduler.ReduceLROnPlateauScheduler
  kwargs:
    factor: 0.75
    metric_name: loss
    patience: 12
    terminate_on_low_lr: 1.0e-06
trainer:
  epochs: 1000
  evaluator: aimnet.train.utils.default_evaluator
  trainer: aimnet.train.utils.default_trainer
wandb:
  init:
    mode: offline
    entity: ivo-needfjes
    project: aimnet2_project
  watch_model:
    log: all
    log_freq: 1000
    log_graph: true

```

## S4 Removed umbrella sampling simulations

**Table S1:** List of removed umbrella sampling simulations. Values represent the center-of-mass (COM) distance in Å. The number in parentheses represents the number of failed runs out of the 10 simulations performed per window (e.g., 2.0 (3) means 3 simulations were removed at 2.0 Å).

| System                                           | Data             | Model           | Removed COM distances (number)                                                        |
|--------------------------------------------------|------------------|-----------------|---------------------------------------------------------------------------------------|
| $\text{H}_2\text{SO}_4\text{-H}_2\text{SO}_4$    | GFN1-xTB         | AIMNet2         | 2.0 (3), 2.2 (2), 2.6 (2), 2.8, 3.8, 4.8, 5.0 (2), 5.2, 5.4                           |
|                                                  |                  | PaiNN           | None                                                                                  |
|                                                  |                  | $\Delta$ -PaiNN | None                                                                                  |
|                                                  | $\omega$ B97X-3c | AIMNet2         | None                                                                                  |
|                                                  |                  | PaiNN           | None                                                                                  |
|                                                  |                  | $\Delta$ -PaiNN | None                                                                                  |
| $\text{H}_2\text{SO}_4\text{-NH}(\text{CH}_3)_2$ | GFN1-xTB         | AIMNet2         | 2.0 (2), 2.2 (2), 3.6                                                                 |
|                                                  |                  | PaiNN           | 2.0, 2.2, 2.4 (2)                                                                     |
|                                                  |                  | $\Delta$ -PaiNN | <i>Not performed</i>                                                                  |
|                                                  | $\omega$ B97X-3c | AIMNet2         | 2.0                                                                                   |
|                                                  |                  | PaiNN           | 2.0 (2), 2.2 (2)                                                                      |
|                                                  |                  | $\Delta$ -PaiNN | None                                                                                  |
| $\text{H}_2\text{SO}_4\text{-HSO}_4^-$           | GFN1-xTB         | AIMNet2         | 2.2, 2.4, 2.8, 3.2 (2), 13.4, 16.2, 17.4                                              |
|                                                  |                  | PaiNN           | 2.0                                                                                   |
|                                                  |                  | $\Delta$ -PaiNN | <i>Not performed</i>                                                                  |
|                                                  | $\omega$ B97X-3c | AIMNet2         | 2.2, 2.4, 2.8, 3.2 (2), 13.4, 16.2, 17.4                                              |
|                                                  |                  | PaiNN           | None                                                                                  |
|                                                  |                  | $\Delta$ -PaiNN | 2.6, 7.4, 9.4, 10.2 (2), 11.4, 11.8, 12.0 (2), 12.2 (2), 12.4, 12.8, 13.0, 18.4, 19.2 |

## S5 Repulsive region of the $\text{H}_2\text{SO}_4\text{-H}_2\text{SO}_4$ potential of mean force

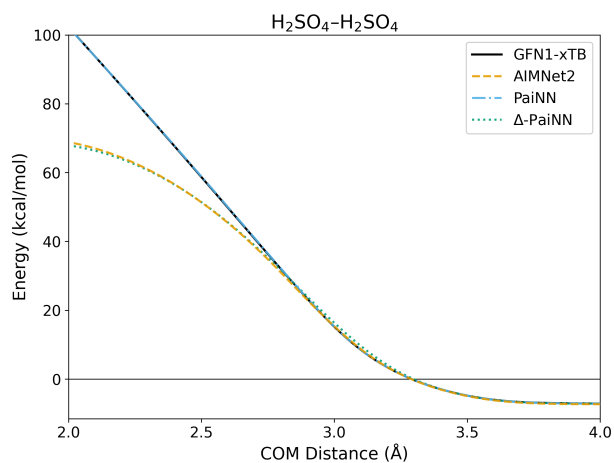

**Figure S3:** The repulsive region of the potential of mean force along the center-of-mass (COM) distance obtained from umbrella sampling for the  $\text{H}_2\text{SO}_4\text{-H}_2\text{SO}_4$  collision system. Results are shown for GFN1-xTB and the AIMNet2, PaiNN, and  $\Delta$ -PaiNN machine learning models trained on GFN1-xTB.

## S6 Collision probability heat maps

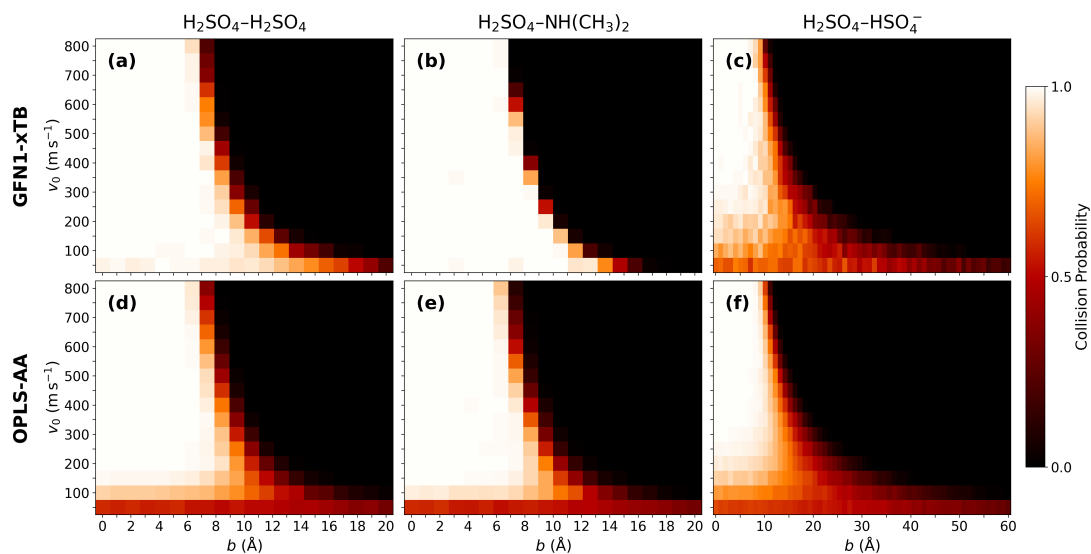

**Figure S4:** Collision probabilities derived from molecular dynamics simulations for the  $\text{H}_2\text{SO}_4\text{-H}_2\text{SO}_4$ ,  $\text{H}_2\text{SO}_4\text{-NH}(\text{CH}_3)_2$ , and  $\text{H}_2\text{SO}_4\text{-HSO}_4^-$  system at 300 K. The heat maps show the probability distribution across impact parameter  $b$  and initial relative velocity  $v_0$  for the reference GFN1-xTB method (Grimme et al., 2017) and the classical OPLS-AA force field method (Jorgensen et al., 1996).

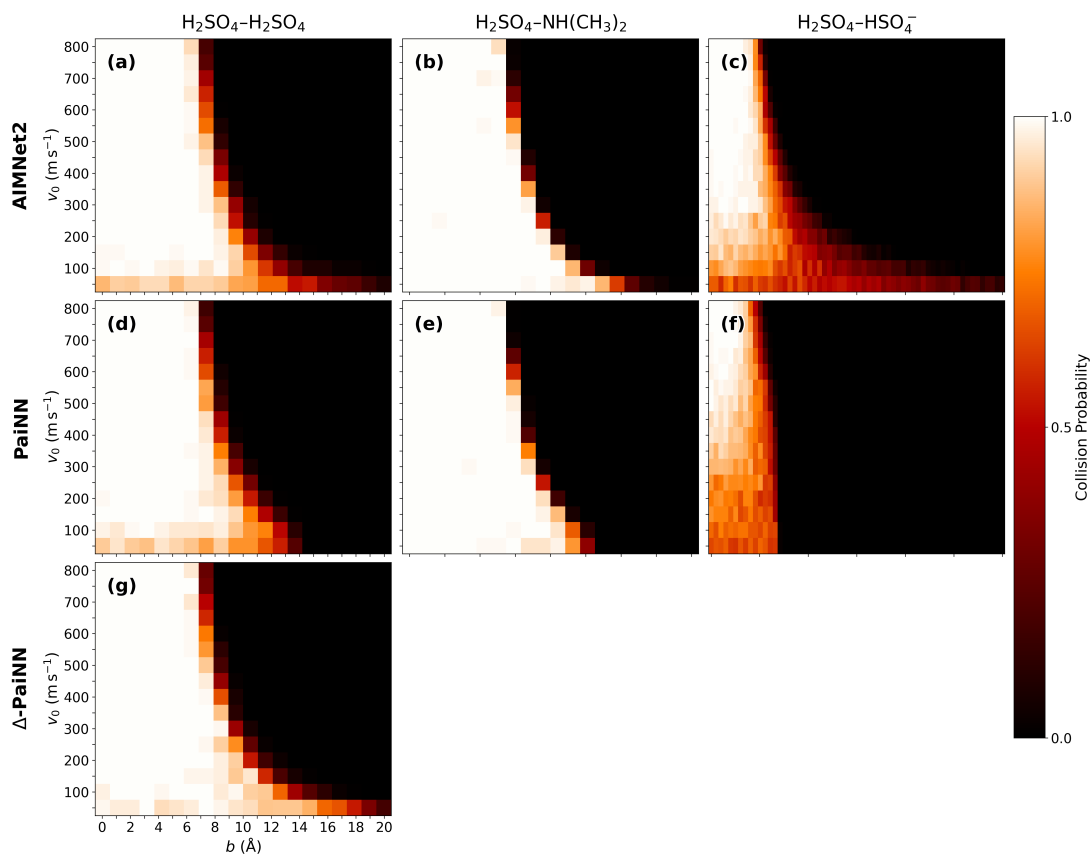

**Figure S5:** Collision probabilities derived from molecular dynamics simulations for the  $\text{H}_2\text{SO}_4\text{-H}_2\text{SO}_4$ ,  $\text{H}_2\text{SO}_4\text{-NH}(\text{CH}_3)_2$ , and  $\text{H}_2\text{SO}_4\text{-HSO}_4^-$  system at 300 K. The heat maps show the probability distribution across impact parameter  $b$  and initial relative velocity  $v_0$  for the AIMNet2 (Anstine et al., 2025), PaiNN (Schütt et al., 2021), and  $\Delta$ -PaiNN machine learning models trained on GFN1-xTB reference data (Grimme et al., 2017).

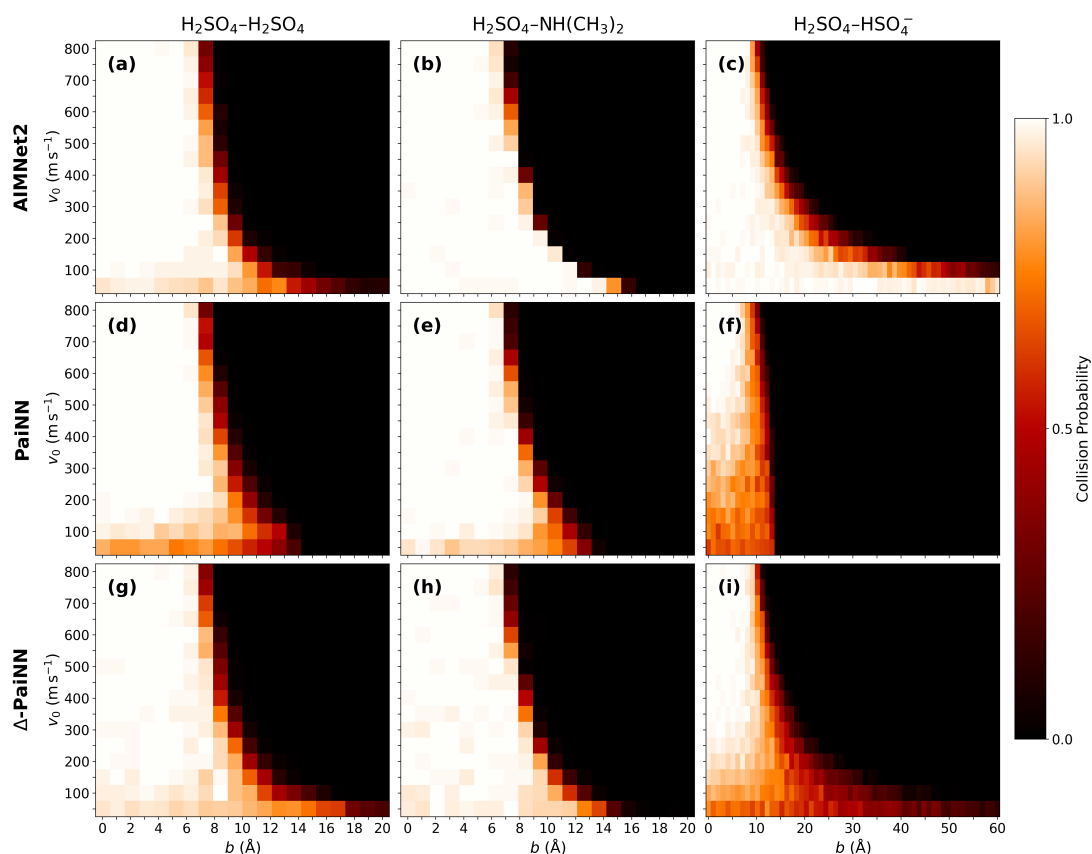

**Figure S6:** Collision probabilities derived from molecular dynamics simulations for the  $\text{H}_2\text{SO}_4\text{-H}_2\text{SO}_4$ ,  $\text{H}_2\text{SO}_4\text{-NH}(\text{CH}_3)_2$ , and  $\text{H}_2\text{SO}_4\text{-HSO}_4^-$  system at 300 K. The heat maps show the probability distribution across impact parameter  $b$  and initial relative velocity  $v_0$  for the AIMNet2 (Anstine et al., 2025), PaiNN (Schütt et al., 2021), and  $\Delta$ -PaiNN machine learning models trained on  $\omega\text{B97X-3c}$  reference data (Müller et al., 2023).

## References

- Anstine, D. M., Zubatyuk, R., and Isayev, O.: AIMNet2: a neural network potential to meet your neutral, charged, organic, and elemental-organic needs, *Chem. Sci.*, 16, 10 228–10 244, <https://doi.org/10.1039/D4SC08572H>, 2025.
- Grimme, S., Bannwarth, C., and Shushkov, P.: A Robust and Accurate Tight-Binding Quantum Chemical Method for Structures, Vibrational Frequencies, and Noncovalent Interactions of Large Molecular Systems Parametrized for All spd-Block Elements ( $Z = 1\text{--}86$ ), *J. Chem. Theory Comput.*, 13, 1989–2009, <https://doi.org/10.1021/acs.jctc.7b00118>, 2017.
- Jorgensen, W. L., Maxwell, D. S., and Tirado-Rives, J.: Development and Testing of the OPLS All-Atom Force Field on Conformational Energetics and Properties of Organic Liquids, *J. Am. Chem. Soc.*, 118, 11 225–11 236, <https://doi.org/10.1021/ja9621760>, 1996.
- Kubečka, J., Ayoubi, D., Tang, Z., Knattrup, Y., Engsvang, M., Wu, H., and Elm, J.: Accurate modeling of the potential energy surface of atmospheric molecular clusters boosted by neural networks, *Environ. Sci.: Adv.*, 3, 1438–1451, <https://doi.org/10.1039/D4VA00255E>, 2024.
- Loukonen, V., Kurtén, T., Ortega, I. K., Vehkamäki, H., Pádua, A. A. H., Sellegri, K., and Kulmala, M.: Enhancing effect of dimethylamine in sulfuric acid nucleation in the presence of water – a computational study, *Atmos. Chem. Phys.*, 10, 4961–4974, <https://doi.org/10.5194/acp-10-4961-2010>, 2010.
- Müller, M., Hansen, A., and Grimme, S.:  $\omega\text{B97X-3c}$ : A composite range-separated hybrid DFT method with a molecule-optimized polarized valence double- $\zeta$  basis set, *J. Chem. Phys.*, 158, 014 103, <https://doi.org/10.1063/5.0133026>, 2023.
- Schütt, K. T., Unke, O. T., and Gastegger, M.: Equivariant message passing for the prediction of tensorial properties and molecular spectra, *arXiv*, abs/2102.03150, <https://doi.org/10.48550/arXiv.2102.03150>, 2021.
